# Supplementary material
Source: HighWire-hosted journal article supplement (https://www.cmajopen.ca/highwire/filestream/85471/field_highwire_adjunct_files/0/2020-0116-1-at.pdf)
Supplement: 2020-0116-1-at.pdf [file 2020-0116-1-at.pdf]

**Table 2: Codes used to identify population and primary outcome**

| Database                                                                                                                 | Codes                                                                                                                                                                                                                                                                                                                                                                                                                                                                       | Purpose                                                         |
|--------------------------------------------------------------------------------------------------------------------------|-----------------------------------------------------------------------------------------------------------------------------------------------------------------------------------------------------------------------------------------------------------------------------------------------------------------------------------------------------------------------------------------------------------------------------------------------------------------------------|-----------------------------------------------------------------|
| National Ambulatory Care Reporting Services                                                                              | <b>International Classification of Diseases 10CA diagnosis codes:</b><br><br>S52.500, S52.580, S52.590, S52.600                                                                                                                                                                                                                                                                                                                                                             | Baseline cohort                                                 |
| National Ambulatory Care Reporting Services<br><br>Canadian Institute for Health Information Discharge Abstract Database | <b>International Classification of Diseases 10CA<br/>Canadian Classification of Health Interventions codes:</b><br><br>1TV73xx, 1TV03HAKC, 1UB73xx, 1UB03HAKC, 1TV74xxxxx, 1UB74xxxxx                                                                                                                                                                                                                                                                                       | Exclusion:<br><br>Manipulations<br>Operations<br>Other injuries |
| Canadian Institute for Health Information Discharge Abstract Database                                                    | <b>International Classification of Diseases 10CA diagnosis codes:</b><br>G80x, F06x, D56x, E10x, E11x, E13x, E14x, E20x-E24x, E26x, E27x, E55x, E58, E84x, E835, K50x, K51x, M80xx, M81x, M82x, N18x, N250, Q780<br><br><b>International Classification of Diseases 9 diagnosis codes:</b><br><i>250.x, 252.0x, 252.1, 253.x, 255.x, 259.3, 268.x, 269.3, 275.3, 275.4x, 277.x, 282.4x, 317, 318.x, 319, 343.x, 555.x, 556.x, 579.0, 585, 588.x, 733.0x, 733.1x, 756.5x</i> | Exclusion:<br><br>Comorbidities                                 |
| Ontario Health Insurance Plan                                                                                            | <b>Fee codes:</b><br><br>E532, F004-F085, F087, F094-F105, F107, F108, F110, F115, F118-F125, F130, F131, F134-F140, F142-F144, F146, F150, F200, F201                                                                                                                                                                                                                                                                                                                      | Exclusion:<br><br>Fractures within 6 weeks                      |
| Ontario Health Insurance Plan                                                                                            | <b>Diagnosis codes:</b><br>813, 829, 842<br><br><b>Fee codes:</b><br>A001, A003-A008, A063-A066, A260-A266, A565, A888, A901, A903, A905, A917, A935, F024, F027, F028, F031, F032, F046, K013, K017, K130, K267, K269, Q601, Q603                                                                                                                                                                                                                                          | Primary outcome                                                 |

x = Denotes the inclusion of all subsequent codes under the same heading.
